# Supplementary material for: ARHGEF15 overexpression worsens the prognosis in patients with pancreatic ductal adenocarcinoma through enhancing the motility and proliferative activity of the cancer cells
Source: Springer Nature journal article supplement (doi:10.1186/s12943-016-0516-4), 2016-05-04
Supplement: MOESM1 [file 10111312]

| ranking | ps                      | gene               | name                                                                                                   | p value  | median of high expression | median of low expression | prognosis |
|---------|-------------------------|--------------------|--------------------------------------------------------------------------------------------------------|----------|---------------------------|--------------------------|-----------|
| 1       | g6031204_3p_at          | HNF1B              | HNF1 homeobox B                                                                                        | 0.000002 | 413                       | 715                      | poor      |
| 2       | g7662377_3p_at          | ARHGEF15           | Rho guanine nucleotide exchange factor (GEF) 15                                                        | 0.000025 | 420.5                     | 786                      | poor      |
| 3       | 228012_3p_at            | MATR3              | matrin 3                                                                                               | 0.000033 | 381                       | 755                      | poor      |
| 4       | Hs.90998.3.S1_3p_a_at   | SEPT6              | septin 6                                                                                               | 0.000045 | 413                       | 640                      | poor      |
| 5       | Hs.112396.0.S1_3p_at    | PSME4              | proteasome (prosome, macropain) activator subunit 4                                                    | 0.000051 | 413                       | 755                      | poor      |
| 6       | 206147_3p_x_at          | SCML2              | sex comb on midleg-like 2 (Drosophila)                                                                 | 0.000057 | 428                       | 629                      | poor      |
| 7       | Hs2.293216.1.S1_3p_s_at | PPIL4 /// ZC3H12D  | peptidylprolyl isomerase (cyclophilin)-like 4 /// zinc finger CCCH-type containing 12D                 | 0.000086 | 436                       | 755                      | poor      |
| 8       | Hs.278657.1.S1_3p_a_at  | MST1 /// MST1P2    | macrophage stimulating 1 (hepatocyte growth factor-like) /// macrophage stimulating 1 (hepatocyte grow | 0.000104 | 367                       | 715                      | poor      |
| 9       | g4417209_3p_a_at        | ASH2L              | ash2 (absent, small, or homeotic)-like (Drosophila)                                                    | 0.000106 | 428                       | 640                      | poor      |
| 10      | g8923098_3p_s_at        | TRPM6              | transient receptor potential cation channel, subfamily M, member 6                                     | 0.000116 | 786                       | 442.5                    | good      |
| 11      | Hs.105104.0.A1_3p_x_at  | RASSF6             | Ras association (RalGDS/AF-6) domain family member 6                                                   | 0.000188 | 449                       | 826                      | poor      |
| 12      | Hs2.383169.1.S1_3p_at   | IGHA1 /// IGHD /// | immunoglobulin heavy constant alpha 1 /// immunoglobulin heavy constant delta /// immunoglobulin hea   | 0.000240 | 786                       | 442.5                    | good      |
| 13      | Hs2.321733.1.S1_3p_x_at | LOC100292680       | hypothetical LOC100292680                                                                              | 0.000242 | 428                       | 715                      | poor      |
| 14      | Hs.129061.0.S1_3p_at    | C16orf88           | chromosome 16 open reading frame 88                                                                    | 0.000258 | 449                       | 715                      | poor      |
| 15      | Hs.101689.0.A1_3p_at    | RBMS3              | RNA binding motif, single stranded interacting protein 3                                               | 0.000295 | 428                       | 640                      | poor      |
| 16      | g11321627_3p_at         | CTRC               | chymotrypsin C (caldecrin)                                                                             | 0.000307 | 413                       | 640                      | poor      |
| 17      | Hs.5794.0.A1_3p_at      | BRP44              | brain protein 44                                                                                       | 0.000329 | 786                       | 431                      | good      |
| 18      | Hs.124776.0.A1_3p_at    | CDH6               | cadherin 6, type 2, K-cadherin (fetal kidney)                                                          | 0.000375 | 413                       | 640                      | poor      |
| 19      | g5729872_3p_a_at        | HPSE               | heparanase                                                                                             | 0.000377 | 786                       | 449.5                    | good      |
| 20      | Hs.101651.0.S1_3p_at    | KRT8P12            | keratin 8 pseudogene 12                                                                                | 0.000380 | 436                       | 715                      | poor      |
| 21      | Hs.78353.2.A1_3p_a_at   | SRPK2              | SRSF protein kinase 2                                                                                  | 0.000391 | 644                       | 432                      | good      |
| 22      | Hs.5905.0.A1_3p_at      | GABPA              | GA binding protein transcription factor, alpha subunit 60kDa                                           | 0.000412 | 449                       | 755                      | poor      |
| 23      | Hs2.385557.1.S1_3p_at   | SORBS2             | sorbin and SH3 domain containing 2                                                                     | 0.000452 | 449                       | 640                      | poor      |
| 24      | Hs.98288.0.A1_3p_at     | AQPEP              | laeverin                                                                                               | 0.000455 | 614                       | 397                      | good      |
| 25      | Hs.303157.10.S1_3p_x_at | PRSS3              | protease, serine, 3                                                                                    | 0.000463 | 449                       | 640                      | poor      |
| 26      | Hs.7655.2.A1_3p_a_at    | U2AF2              | U2 small nuclear RNA auxiliary factor 2                                                                | 0.000474 | 367                       | 625                      | poor      |
| 27      | Hs.23439.0.A1_3p_at     | C4orf32            | chromosome 4 open reading frame 32                                                                     | 0.000496 | 449                       | 640                      | poor      |
| 28      | Hs2.272321.2.S1_3p_at   | TTC26              | tetratricopeptide repeat domain 26                                                                     | 0.000508 | 866                       | 442.5                    | good      |
| 29      | g7019406_3p_a_at        | MGAT4C             | mannosyl (alpha-1,3-)-glycoprotein beta-1,4-N-acetylglucosaminyltransferase, isozyme C (putative)      | 0.000567 | 413                       | 625                      | poor      |
| 30      | Hs.202737.1.A1_3p_at    | WDR89              | WD repeat domain 89                                                                                    | 0.000591 | 786                       | 443                      | good      |
| 31      | Hs.173048.0.S1_3p_at    | LOC100268168       | hypothetical LOC100268168                                                                              | 0.000606 | 614                       | 420.5                    | good      |
| 32      | g4506144_3p_x_at        | PRSS1              | protease, serine, 1 (trypsin 1)                                                                        | 0.000608 | 449                       | 640                      | poor      |
| 33      | Hs2.16758.1.A1_3p_s_at  | SPIRE1             | spire homolog 1 (Drosophila)                                                                           | 0.000621 | 413                       | 715                      | poor      |
| 34      | g13543517_3p_s_at       | CELA3A /// CELA3B  | chymotrypsin-like elastase family, member 3A /// chymotrypsin-like elastase family, member 3B          | 0.000670 | 449                       | 640                      | poor      |
| 35      | Hs.16340.0.S2_3p_at     | SUOX               | sulfite oxidase                                                                                        | 0.000709 | 413                       | 640                      | poor      |
| 36      | g4505846_3p_s_at        | PLA2G1B            | phospholipase A2, group IB (pancreas)                                                                  | 0.000740 | 449                       | 640                      | poor      |
| 37      | Hs.40323.2.A1_3p_at     | BUB3               | Budding uninhibited by benzimidazoles 3 homolog (yeast)                                                | 0.000809 | 436                       | 700                      | poor      |
| 38      | g12803670_3p_a_at       | DUSP4              | dual specificity phosphatase 4                                                                         | 0.000814 | 644                       | 442.5                    | good      |
| 39      | g3387924_3p_a_at        | RNF13              | ring finger protein 13                                                                                 | 0.000821 | 436                       | 625                      | poor      |
| 40      | g180196_3p_s_at         | CD44               | CD44 molecule (Indian blood group)                                                                     | 0.000833 | 636                       | 442.5                    | good      |
| 41      | Hs.69171.3.A1_3p_at     | PKN2               | protein kinase N2                                                                                      | 0.000835 | 644                       | 432                      | good      |
| 42      | g7706400_3p_a_at        | TAOK2              | TAO kinase 2                                                                                           | 0.000838 | 413                       | 625                      | poor      |
| 43      | g6118538_3p_a_at        | BACE1              | beta-site APP-cleaving enzyme 1                                                                        | 0.000873 | 413                       | 628                      | poor      |
| 44      | Hs.156346.0.S1_3p_a_at  | TOP2A              | topoisomerase (DNA) II alpha 170kDa                                                                    | 0.000880 | 786                       | 424.5                    | good      |
| 45      | Hs.129872.1.S2_3p_at    | SPAG9              | sperm associated antigen 9                                                                             | 0.000946 | 786                       | 449.5                    | good      |
| 46      | g4505802_3p_x_at        | PIK3CG             | phosphoinositide-3-kinase, catalytic, gamma polypeptide                                                | 0.000959 | 449                       | 625                      | poor      |
