# Supplementary material for: ARHGEF15 overexpression worsens the prognosis in patients with pancreatic ductal adenocarcinoma through enhancing the motility and proliferative activity of the cancer cells
Source: Springer Nature journal article supplement (doi:10.1186/s12943-016-0516-4), 2016-05-04
Supplement: MOESM2 [file 10111312]

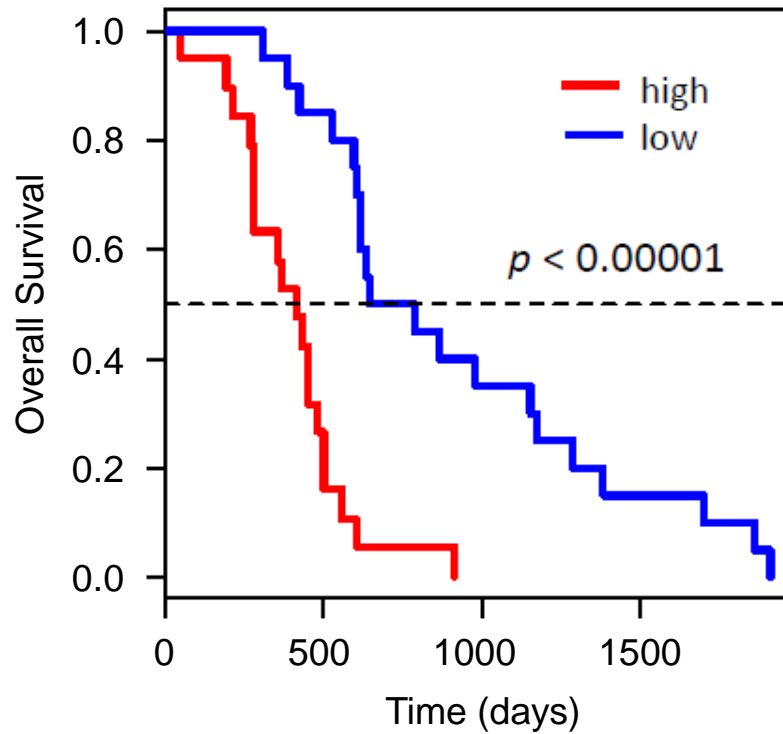

**Additional file 2: Figure S1.** Higher expression of HNF1B is correlated with worse survival.
